# Supplementary material for: A new class of dual responsive self-healable hydrogels based on a core crosslinked ionic block copolymer micelle prepared via RAFT polymerization and Diels–Alder “click” chemistry
Source: Royal Society of Chemistry journal article supplement (doi:10.1039/c7sm01906h), 2017-01-01
Supplement: c7sm01906h1.pdf [file c7sm01906h1.pdf]

## A New Class of Dual Responsive Self-healable Hydrogels Based on Core Crosslinked Ionic Block Co-polymers micelle Prepared via RAFT Polymerization and Diels-Alder “click” chemistry

Sovan Lal Banerjee, Nikhil K. Singha\*

Rubber Technology Centre, Indian Institute of Technology, Kharagpur, India.

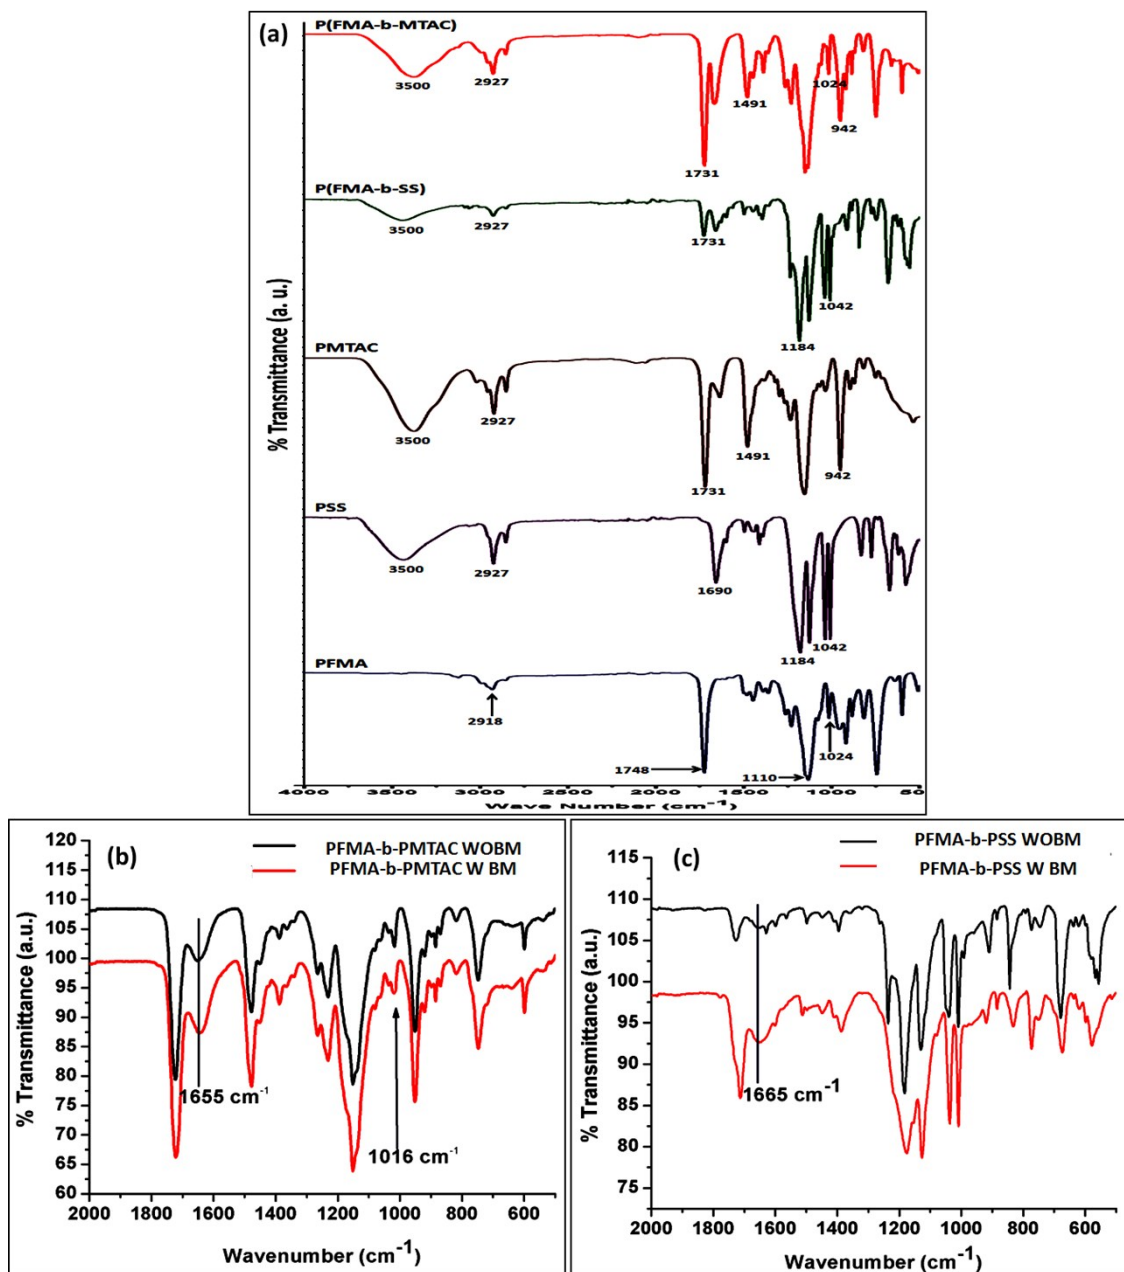

**Figure. S1:** FTIR analysis of (a) homopolymers and the block copolymers, (b) PFMA-*b*-PMTAC with and without core crosslinking and (c) PFMA-*b*-PSS with and without core crosslinking.

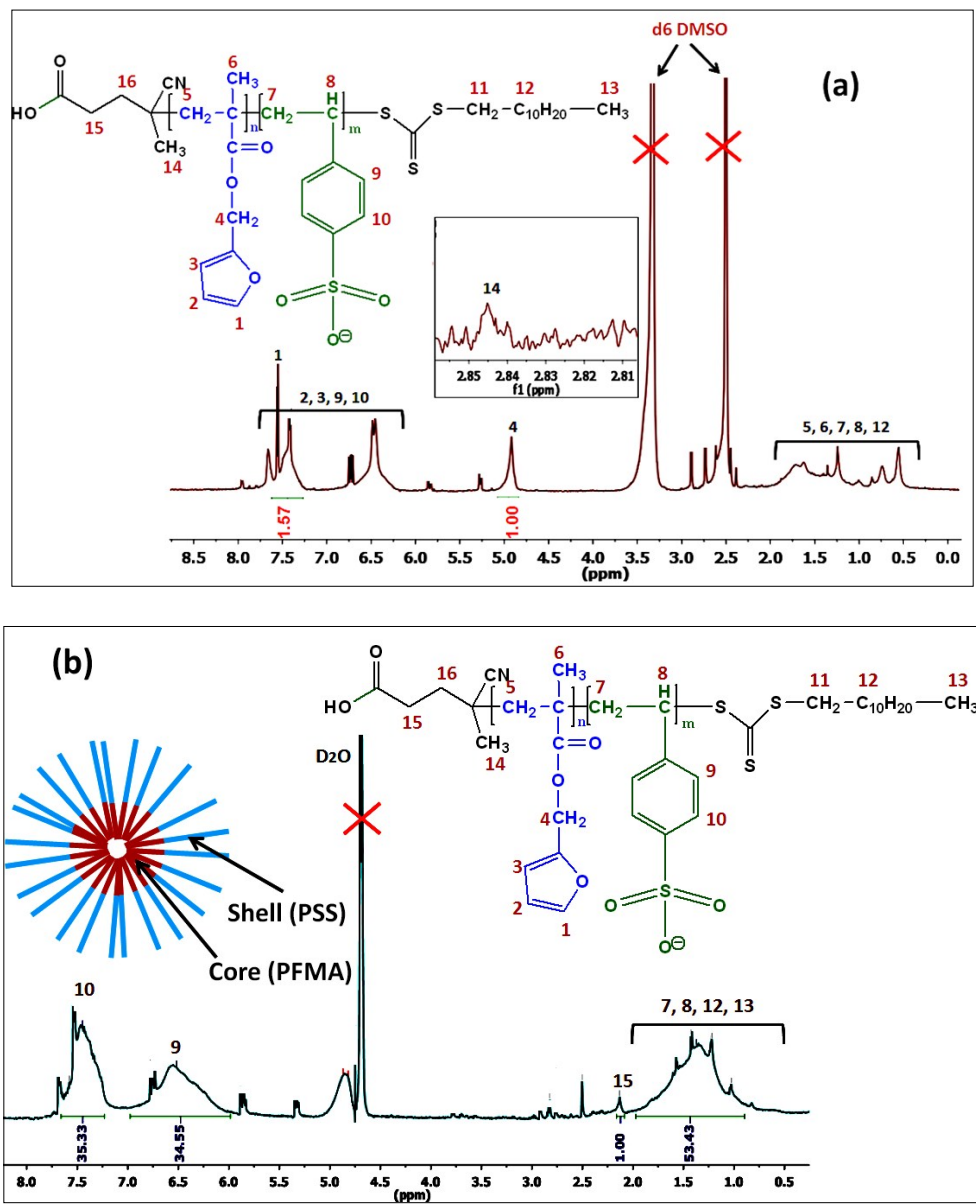

**Figure. S2:**  $^1\text{H}$  NMR spectra of (a) PFMA-*b*-PSS in  $\text{d}_6$  DMSO, (b) PFMA-*b*-PSS in  $\text{D}_2\text{O}$ .

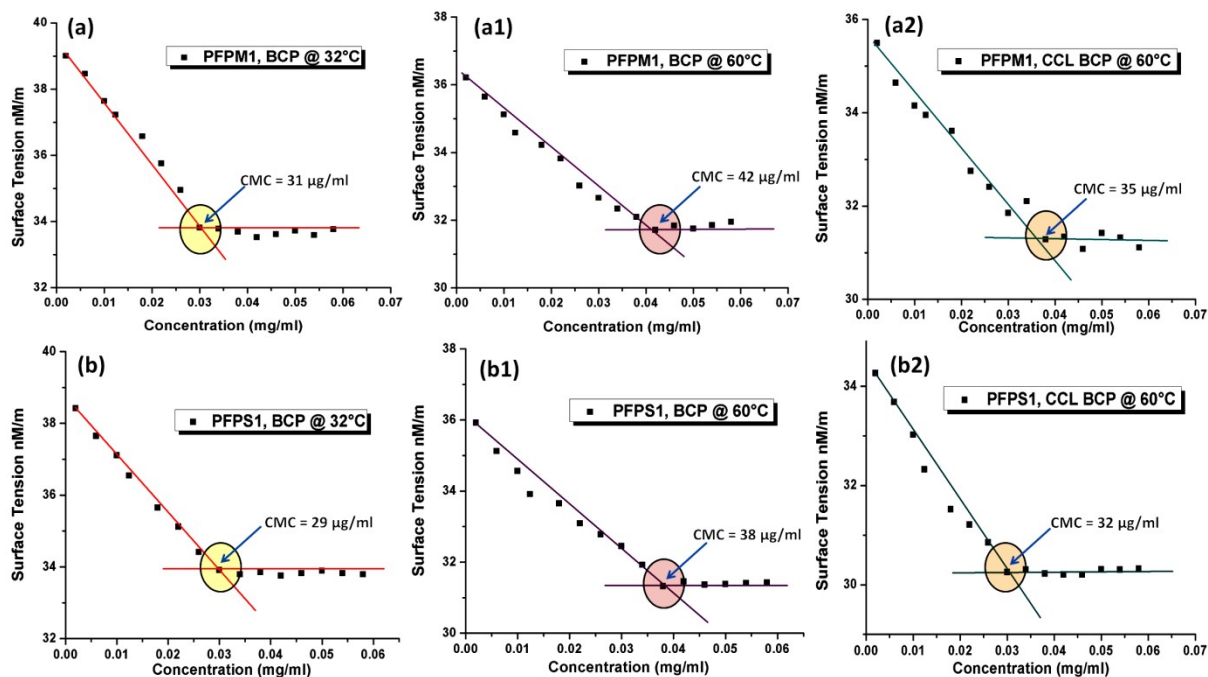

**Figure S3:** CMC values of the cationic (a, a1 and a2) and anionic (b, b1, b2) block copolymers.

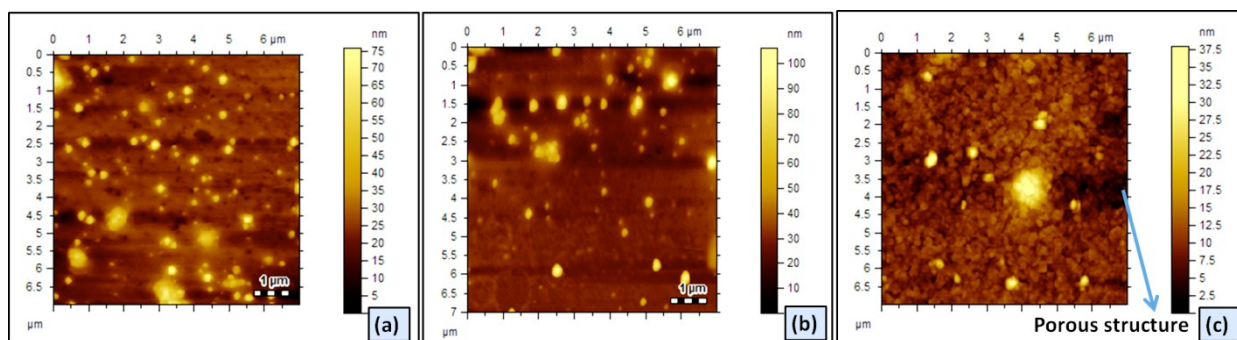

**Figure S4:** AFM of the (a) Core cross-linked PFMA-*b*-PMTAC micelle, (b) core cross-linked PFMA-*b*-PSS micelle and (c) the formed porous hydrogel via ionic interaction of polyelectrolyte BCPs.

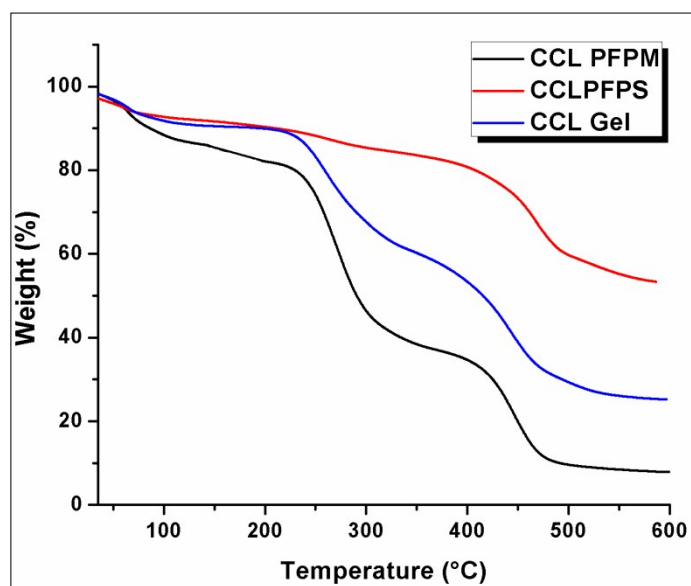

**Figure S5:** Thermogravimetric analysis of respective components.

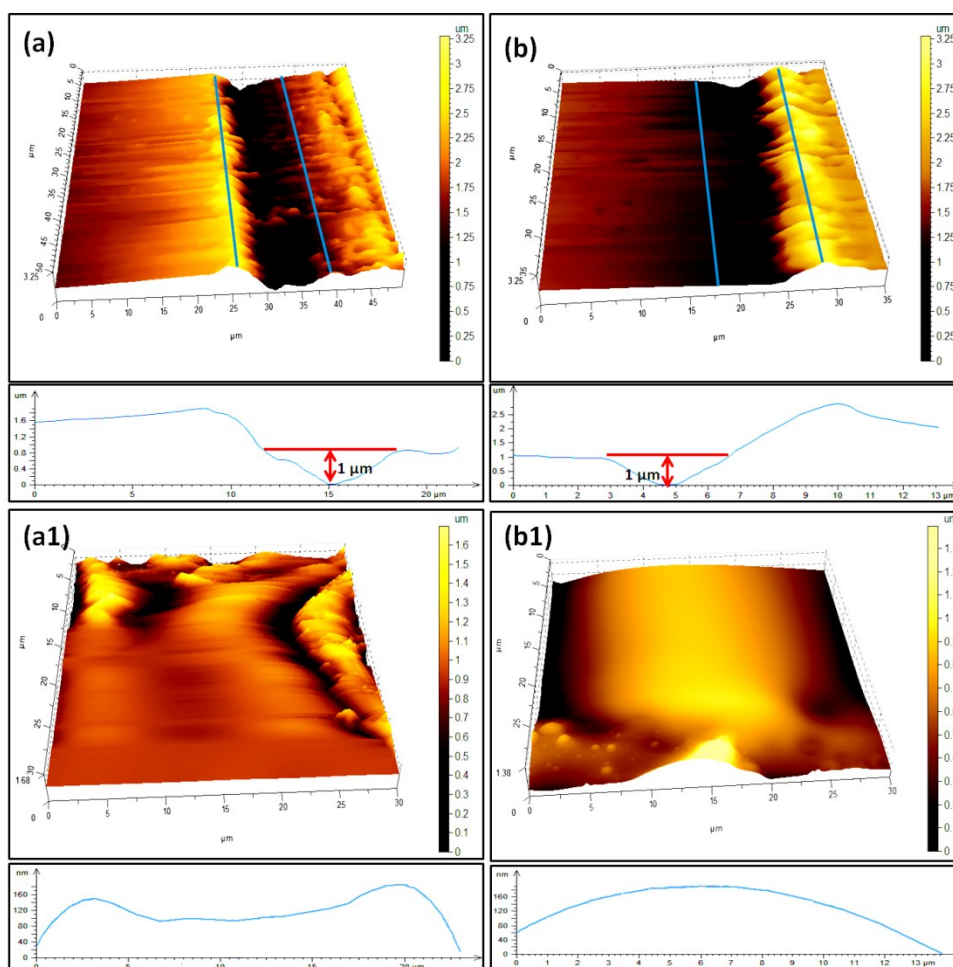

**Figure S6:** AFM 3D surface profilometry analysis of the self-healing in CCL BCP gel upon application of heat (**a and a1**) and water (**b and b1**).
